# Supplementary material
Source: PubMed Central journal article supplement (PMC6450082)
Supplement: NIHMS1520083-supplement-1.pdf [file NIHMS1520083-supplement-1.pdf]

---

**SUPPLEMENTAL MATERIALS**

---

Table S1.

| Variable                        | 1 | 2     | 3     | 4     | 5     | 6     | 7     | 8      | 9    |
|---------------------------------|---|-------|-------|-------|-------|-------|-------|--------|------|
| 1 <u>C</u> onceptually accurate | — | .48** | .59** | .70** | .56** | .77** | .46** | -.39** | -.01 |

*Intercorrelations between study variables*

|   |                                  |   |       |       |       |       |       |        |      |
|---|----------------------------------|---|-------|-------|-------|-------|-------|--------|------|
| 2 | <u>O</u> bservant and responsive | — | .71** | .69** | .78** | .85** | .47** | .00    | -.03 |
| 3 | <u>A</u> ctively structures      |   | —     | .78** | .71** | .88** | .50** | -.08   | -.09 |
| 4 | <u>C</u> orrective feedback      |   |       | —     | .75** | .91** | .51** | -.07   | -.09 |
| 5 | <u>H</u> ope and motivation      |   |       |       | —     | .88** | .54** | -.09   | -.14 |
| 6 | COACH composite score            |   |       |       |       | —     | .58** | -.15   | -.09 |
| 7 | Caregiver engagement             |   |       |       |       |       | —     | -.26** | -.12 |
| 8 | Study Condition                  |   |       |       |       |       |       | —      | -.01 |
| 9 | Session Length                   |   |       |       |       |       |       |        | —    |

---

*Note.* \*\*  $p < .01$ .

Table S2.

*Intraclass correlation coefficients (ICC) and 95% confidence intervals across conditions*

|                   | Early Steps<br>Efficacy Trial | Community<br>Implementation | Community<br>Services as Usual | Overall          |                  |
|-------------------|-------------------------------|-----------------------------|--------------------------------|------------------|------------------|
|                   | Mean (SD)                     | 5.14 (1.36)                 | 4.46 (.99)                     | 4.13 (1.28)      | 4.65 (1.27)      |
| Complete Sessions | ICC (90% CI)                  | 0.82 (.34   .96)            | 0.71 (.24   .88)               | 0.67 (.20   .96) | 0.75 (.48   .86) |
|                   | $\alpha$                      | .97                         | .90                            | .93              | .93              |
|                   | Mean (SD)                     | 4.73 (.90)                  | 4.38 (.87)                     | 3.88 (.97)       | 4.37 (.96)       |
| Segments          | ICC (90% CI)                  | 0.76 (.22   .94)            | 0.34 (.10   .67)               | 0.41 (.05   .94) | 0.61 (.31   .84) |
|                   | $\alpha$                      | .89                         | .88                            | .92              | .90              |

*Note.* SD = standard deviation. ICC = one-way random effects model intraclass correlation coefficient.  $\alpha$  = internal consistency.
